# Supplementary material
Source: Research Square preprint supplement (doi:10.21203/rs.3.rs-9311646/v1)
Supplement: Supplementary file 1 [file a2ef48178c3fc00ba4602890.xlsx]

## Sheet: Sheet
Ligand	Abbr.	Molar ratio of metal center			η10 (mV)	Ref.
		Fe	Co	Ni
terephthalic acid	BDC	0	0.2	0.8	274	Adv. Funct. Mater. 34, 2304380 (2024)
terephthalic acid	BDC	0	0.4	0.6	299
terephthalic acid	BDC	0	0.8	0.2	309
terephthalic acid	BDC	0	0	1	324
terephthalic acid	BDC	0	1	0	353
2,5-dimercaptoterephthalic acid	DMTP	0.25	0	0.75	240	Adv. Mater. 35, 2300945 (2023)
terephthalic acid	BDC	0.25	0	0.75	300
2,5-dihydroxyterephthalic acid	DHTP	1	0	0	215	Adv. Mater. 35, 2208904 (2023)
2,5-dihydroxyterephthalic acid	DHTP	1	0	0	240
dimethylimidazole	2-MIM	0	1	0	271	Angew. Chem. Int. Ed. 60, 26397 (2021)
trimesic acid	BTC	0.58	0	0.42	399	Nat Commun. 13, 6171 (2022)
2,5-dihydroxyterephthalic acid	DHTP	0	0	1	330	Nat. Energy 5, 881–890 (2020)
2,5-dihydroxyterephthalic acid	DHTP	0.1	0	0.9	198
2,5-dihydroxyterephthalic acid	DHTP	0.5	0	0.5	240
2,5-dihydroxyterephthalic acid	DHTP	0	0.5	0.5	270
2,5-dihydroxyterephthalic acid	DHTP	0.9	0	0.1	270
2,5-dihydroxyterephthalic acid	DHTP	1	0	0	370
terephthalic acid	BDC	0	0.5	0.5	250	Nat. Energy 1, 16184 (2016)
terephthalic acid	BDC	0	1	0	371
terephthalic acid	BDC	0	0	1	321
terephthalic acid	BDC	0.25	0	0.75	320	ACS Catal. 10, 5691−5697 (2022)
(terephthalic acid)0.8(benzoic acid)0.2	(BDC)0.8(BA)0.2	0.25	0	0.75	230
biphenyl-4,4'-dicarboxylic acid	NDC	0.13	0	0.87	295	Appl. Surf. Sci. 592, 153252 (2022)
biphenyl-4,4'-dicarboxylic acid	NDC	0	0	1	502
biphenyl-4,4'-dicarboxylic acid	NDC	1	0	0	347
benzotriazole-5-carboxylic acid	H2BTC	0	1	0	384	Dalton Trans. 49, 750-756 (2020)
benzotriazole-5-carboxylic acid	H2BTC	0.07	0.93	0	349
2,5-dihydroxyterephthalic acid	DHTP	1	0	0	218	Chem. Eng. J. 427, 131498 (2022)
2-aminoterephthalic acid	BDC(NH2)	0.5	0	0.5	331	J. Alloy. Compd. 850, 156583 (2021)
terephthalic acid	BDC	0.33	0.67	0	295	Sustainable Energy Fuels 5, 1095-1102 (2021)
terephthalic acid	BDC	0.33	0.67	0	351
terephthalic acid	BDC	0.33	0.67	0	328
terephthalic acid	BDC	0	1	0	470
terephthalic acid	BDC	1	0	0	600
2-aminoterephthalic acid	BDC(NH2)	0	0.5	0.5	251	Appl. Surf. Sci. 542, 148739 (2021)
2-aminoterephthalic acid	BDC(NH2)	0.5	0.5	0	266	CrystEngComm 25, 5387-5398 (2023)
2-aminoterephthalic acid	BDC(NH2)	0	1	0	331
dimethylimidazole	2-MIM	0	1	0	346	Small 17, 2105150 (2021)
dimethylimidazole	2-MIM	0	0.5	0.5	304
terephthalic acid	BDC	0.29	0	0.71	322	Electrochim. Acta 381, 138292 (2021)
terephthalic acid	BDC	0.5	0	0.5	266	Mater. Chem. Front. 5, 7191-7198 (2021)
terephthalic acid	BDC	0.5	0	0.5	223
terephthalic acid	BDC	0.5	0	0.5	245
1,4-bis(4H-1,2,4-triazol-4-yl)benzene	BTZ	0	0	1	239	Adv. Sci. 9, 2203712 (2022)
1,4-bis(4H-1,2,4-triazol-4-yl)benzene	BTZ	0.5	0	0.5	357
terephthalic acid	BDC	0	0.5	0.5	470	J. Col. Interf. Science 655, 234-242 (2024)
2,5-dihydroxyterephthalic acid	DHTP	0	0.5	0.5	380
2-aminoterephthalic acid	BDC(NH2)	0	0.5	0.5	415	J. Mater. Chem. A 10, 4936-4943 (2022)
2,5-dihydroxyterephthalic acid	DHTP	0	1	0	451	Electrochim. Acta 416, 140293 (2022)
terephthalic acid	BDC	0	1	0	605	J. Alloy. Compd. 961, 170976 (2023)
2-aminoterephthalic acid	BDC(NH2)	0	0	1	590
2-nitroterephthalic acid	BDC(NO2)	0	0	1	580
terephthalic acid	BDC	0.29	0	0.71	450
2,5-bis(1,2,4-triazol-1-yl)terephthalic acid	H2BTT	1	0	0	512	Angew. Chem. Int. Ed. 59, 13101 (2020)
2,5-bis(1,2,4-triazol-1-yl)terephthalic acid	H2BTT	0.67	0.33	0	353
biphenyl-3,4′,5-tricarboxylic acid	BPTC	1	0	0	555	Angew. Chem. Int. Ed. 57, 9660 (2018)
biphenyl-3,4′,5-tricarboxylic acid	BPTC	0.67	0.33	0	376
biphenyl-3,4′,5-tricarboxylic acid	BPTC	0.67	0	0.33	365
4,5-dicarboxylic acid imidazole	IM	0	1	0	374	J. Mater. Chem. A 7, 14011-14018 (2019)
4,5-dicarboxylic acid imidazole	IM	0.32	0.68	0	349
terephthalic acid	BDC	1	0	0	541	Adv. Energy Mater. 8, 1801564 (2018)
terephthalic acid	BDC	0	1	0	378
terephthalic acid	BDC	0.38	0.62	0	330
2-aminoterephthalic acid	BDC(NH2)	0.38	0.62	0	323
dimethylimidazole	2-MIM	0	0.8	0.2	290	J. Mater. Chem. A 10, 17552-17560 (2022)
dimethylimidazole	2-MIM	0.25	0.5	0.25	230
dimethylimidazole	2-MIM	1	0	0	380	Eur. J. Inorg. Chem. 2021, 702 (2021)
dimethylimidazole	2-MIM	0	1	0	325
dimethylimidazole	2-MIM	0.8	0.2	0	260
2,2'-bipyridine-5,5'-dicarboxylic acid	H2BPYDC	0	0.5	0.5	431	J. Electroanal. Chem. 930, 117144 (2023)
2-methylpyrazine	2-MPYZ	0	0	1	350	ACS Appl. Nano Mater. 4, 14161-14168 (2021)
2-methylpyrazine	2-MPYZ	0.5	0	0.5	290
2-methylpyrazine	2-MPYZ	0	0.5	0.5	380
terephthalic acid	BDC	0	1	0	351	Inorg. Chem. 62, 609-617 (2023)
terephthalic acid	BDC	1	0	0	312	Inorg. Chem. 61, 10934-10941 (2022)
2-nitroterephthalic acid	BDC(NO2)	1	0	0	306
2-hydroxyterephthalic acid	HTP	1	0	0	306
2,5-dihydroxyterephthalic acid	DHTP	1	0	0	302
terephthalic acid	BDC	0	1	0	379	Inorg. Chem. Commun. 158, 111661 (2023)
terephthalic acid	BDC	0	1	0	390
terephthalic acid	BDC	0	1	0	342
terephthalic acid	BDC	0	0	1	386	Electrochim. Acta 354, 136682 (2020)
trimesic acid	BTC	0	0	1	441
terephthalic acid	BDC	0	0	1	458	Small 20, 2407328 (2024)
trimesic acid	BTC	0	0	1	346	ChemElectroChem 5, 2795 (2018）
2,5-thiophene dicarboxylic acid	TDC	0.2	0.4	0.4	295	ACS Appl. Mater. Interfaces 11, 45080-45086 (2019)
2,5-thiophene dicarboxylic acid	TDC	0	1	0	370
2,5-thiophene dicarboxylic acid	TDC	0	0	1	450
2,5-thiophene dicarboxylic acid	TDC	0	0.5	0.5	330
2,5-thiophene dicarboxylic acid	TDC	0.14	0.43	0.43	298
2,5-thiophene dicarboxylic acid	TDC	0.08	0.46	0.46	310
2,5-thiophene dicarboxylic acid	TDC	0.05	0.475	0.475	319
terephthalic acid	BDC	0	0	1	550	Energy Fuels 38, 5397-5406 (2024)
terephthalic acid	BDC	0.29	0	0.71	288	Electrochim. Acta 381, 138292 (2021)
2,5-dihydroxyterephthalic acid	DHTP	0.25	0	0.75	280	Inorg. Chem. 61, 5112-5123 (2022)
trimesic acid	BTC	0	1	0	389	Inorg. Chem. 60, 12685-12690 (2021)
1,5-diamino-4,8-dihydroxy-9,10-anthraceneedione	DDAD	0.25	0.75	0	260	Adv. Mater. 36, 2402388 (2024)
1,5-diamino-4,8-dihydroxy-9,10-anthraceneedione	DDAD	1	0	0	348
1,5-diamino-4,8-dihydroxy-9,10-anthraceneedione	DDAD	0.75	0.25	0	294
1,5-diamino-4,8-dihydroxy-9,10-anthraceneedione	DDAD	0.5	0.5	0	286
1,5-diamino-4,8-dihydroxy-9,10-anthraceneedione	DDAD	0	1	0	303
terephthalic acid	BDC	0	0	1	319	ACS Appl. Mater. Interfaces 14, 15133-15140 (2022)
terephthalic acid	BDC	0.89	0	0.11	257
trimesic acid	BTC	0	1	0	335	Int. J. Hydrogen Energy 47, 12893-12902 (2022)
trimesic acid	BTC	0	0	1	473	Catal. Today 423, 114000 (2023)
terephthalic acid	BDC	0.5	0.5	0	312	Inorg. Chem. Front. 9, 3130-3137 (2022)
2,3,6,7,10,11-hexahydrox-ytriphenylen	HHTP	0	1	0	245	ACS Appl. Nano Mater. 7, 18881-18888 (2024)
terephthalic acid	BDC	0.5	0	0.5	448	Colloid. Surface. A 642, 128469 (2022)
2,5-dihydroxyterephthalic acid	DHTP	0	0	1	624	J. Alloy. Compd. 770, 236-242 (2019)
3,3′,5,5′-azobenzenetetracarboxylic acid	H4ABTC	0.66	0.17	0.17	271	ACS Appl. Mater. Interfaces 11, 45080-45086 (2019)
3,3′,5,5′-azobenzenetetracarboxylic acid	H4ABTC	0.67	0	0.33	307
3,3′,5,5′-azobenzenetetracarboxylic acid	H4ABTC	0.67	0.33	0	318
trimesic acid	BTC	0	1	0	370	Chem. Eng. J. 446, 137045 (2022)
trimesic acid	BTC	0	0	1	390
terephthalic acid	BTC	0.5	0	0.5	250	Small 20, 2400042 (2024)
5-((pyridin-4-ylthio)methyl)isophthalic acid	H2NDC	0.5	0.5	0	355	Catal. Sci. Technol. 10, 3897-3903 (2020)
5-((pyridin-4-ylthio)methyl)isophthalic acid	H2NDC	0.5	0	0.5	501
5-((pyridin-4-ylthio)methyl)isophthalic acid	H2NDC	0	1	0	397
terephthalic acid	BDC	0.23	0	0.77	233	Dalton Trans. 52, 8466-8472 (2023)
terephthalic acid	BDC	1	0	0	498
terephthalic acid	BDC	0	0	1	454
2-aminoterephthalic acid	BDC(NH2)	1	0	0	380	J. Alloy. Compd. 871, 159580 (2021)
Pyrimidine-4,6-dicarboxylic acid	PDB	1	0	0	455	J. Mater. Science Technol. 203, 118-125 (2024)
Pyrimidine-4,6-dicarboxylic acid	PDB	0.25	0.75	0	280
Pyrimidine-4,6-dicarboxylic acid	PDB	0.5	0.5	0	267
Pyrimidine-4,6-dicarboxylic acid	PDB	0.75	0.25	0	288
Pyrimidine-4,6-dicarboxylic acid	PDB	0	1	0	342
terephthalic acid	BDC	1	0	0	405	Small 15, 1903410 (2019)
terephthalic acid	BDC	0	0	1	361
terephthalic acid	BDC	0.2	0.4	0.4	245	J. Colloid Interface Science 603, 148-156 (2021)
2,3,6,7,10,11-hexahydroxytriphenylene	HHTP	1	0	0	420	J. Mater. Chem. A 11, 16683-16694 (2023)
2,3,6,7,10,11-hexahydroxytriphenylene	HHTP	0	1	0	310
2,3,6,7,10,11-hexahydroxytriphenylene	HHTP	0	0	1	332
dimethylimidazole	2-MIM	0	1	0	402	Small 14, 1803576 (2018)
4, 4’, 4’’-benzene-1, 3, 5-triyl-hexabenzoic acid	H6BHB	0	1	0	416	Angew. Chem. Int. Ed. 58, 4227-4231 (2019)
4, 4’, 4’’-benzene-1, 3, 5-triyl-hexabenzoic acid	H6BHB	0	0.67	0.33	400
4, 4’, 4’’-benzene-1, 3, 5-triyl-hexabenzoic acid	H6BHB	0	0.33	0.67	390
4, 4’, 4’’-benzene-1, 3, 5-triyl-hexabenzoic acid	H6BHB	0	0	1	500
terephthalic acid	BDC	0.5	0	0.5	260	Nano Energy 44, 345-352 (2018)
terephthalic acid	BDC	0.5	0.5	0	350
terephthalic acid	BDC	1	0	0	419	ACS Energy Lett. 4, 285-292 (2019)
terephthalic acid	BDC	0.5	0	0.5	281
terephthalic acid	BDC	0.67	0	0.33	280
terephthalic acid	BDC	0.33	0	0.67	260
terephthalic acid	BDC	0.2	0	0.8	280
terephthalic acid	BDC	0	1	0	264	J. Mater. Chem. A, 6 22070 (2018)
4,5-dicarboxylic acid imidazole	IM	1	0	0	677	ACS Catal. 9, 7356 (2019)
4,5-dicarboxylic acid imidazole	IM	0	1	0	385
4,5-dicarboxylic acid imidazole	IM	0.17	0	0.83	351
2,5-dihydroxyterephthalic acid	DHTP	0.25	0.5	0.25	270	J. Am. Chem. Soc. 140, 15336 (2018)
2,3,6,7,10,11-hexahydroxytriphenylene	HHTP	0	0	1	350	Sci. Adv. 7, eabk0919 (2021)
2,5-dihydroxyterephthalic acid	DHTP	1	0	0	423	This work
2,5-dihydroxyterephthalic acid	DHTP	0.9	0	0.1	386
2,5-dihydroxyterephthalic acid	DHTP	0.8	0	0.2	377
2,5-dihydroxyterephthalic acid	DHTP	0.7	0	0.3	361
2,5-dihydroxyterephthalic acid	DHTP	0.6	0	0.4	355
2,5-dihydroxyterephthalic acid	DHTP	0.5	0	0.5	348
2,5-dihydroxyterephthalic acid	DHTP	0.4	0	0.6	337
2,5-dihydroxyterephthalic acid	DHTP	0.3	0	0.7	305
2,5-dihydroxyterephthalic acid	DHTP	0.2	0	0.8	250
2,5-dihydroxyterephthalic acid	DHTP	0.1	0	0.9	274
2,5-dihydroxyterephthalic acid	DHTP	0	0	1	376
2-hydroxyterephthalic acid	HTP	1	0	0	451
2-hydroxyterephthalic acid	HTP	0.9	0	0.1	421
2-hydroxyterephthalic acid	HTP	0.8	0	0.2	418
2-hydroxyterephthalic acid	HTP	0.3	0	0.7	410
2-hydroxyterephthalic acid	HTP	0.4	0	0.6	406
2-hydroxyterephthalic acid	HTP	0.5	0	0.5	389
2-hydroxyterephthalic acid	HTP	0.6	0	0.4	345
2-hydroxyterephthalic acid	HTP	0.3	0	0.7	310
2-hydroxyterephthalic acid	HTP	0.2	0	0.8	285
2-hydroxyterephthalic acid	HTP	0.1	0	0.9	297
2-hydroxyterephthalic acid	HTP	0	0	1	315
